# Supplementary material for: Risk of SARS-CoV-2 Reinfections in a Prospective Inception Cohort Study: Impact of COVID-19 Vaccination
Source: MDPI journal article supplement (doi:10.3390/jcm11123352), 2022-06-10
Supplement: s1 [file s1]

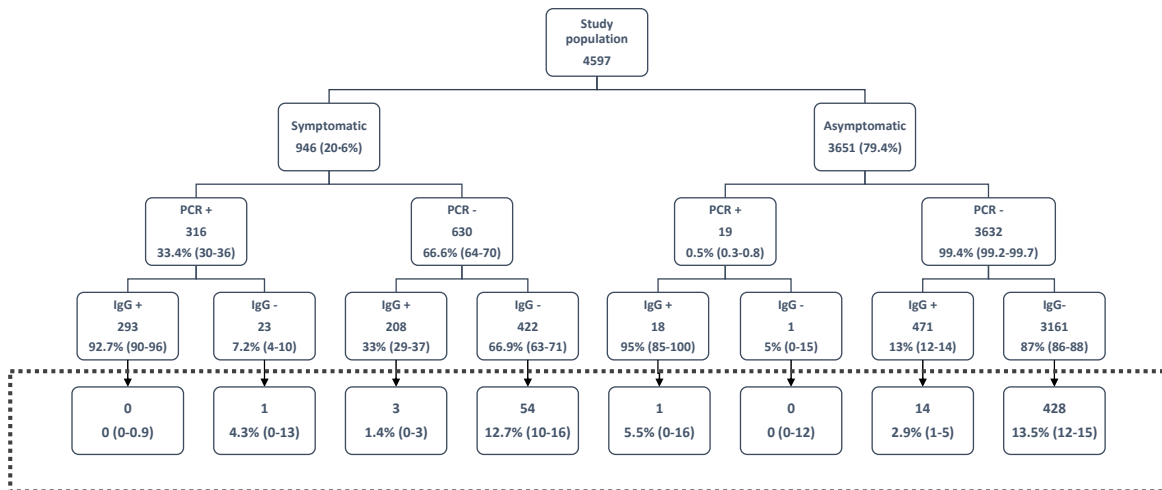

**Figure S1.** Flow diagram of the 4597 HCWs with follow-up until individual vaccination date, classified according to the presence of symptoms, PCR result, and specific serology result (IgG+/IgG-), and the rate of new infections/reinfections (black box). Between parentheses, 95% confidence interval for each rate.

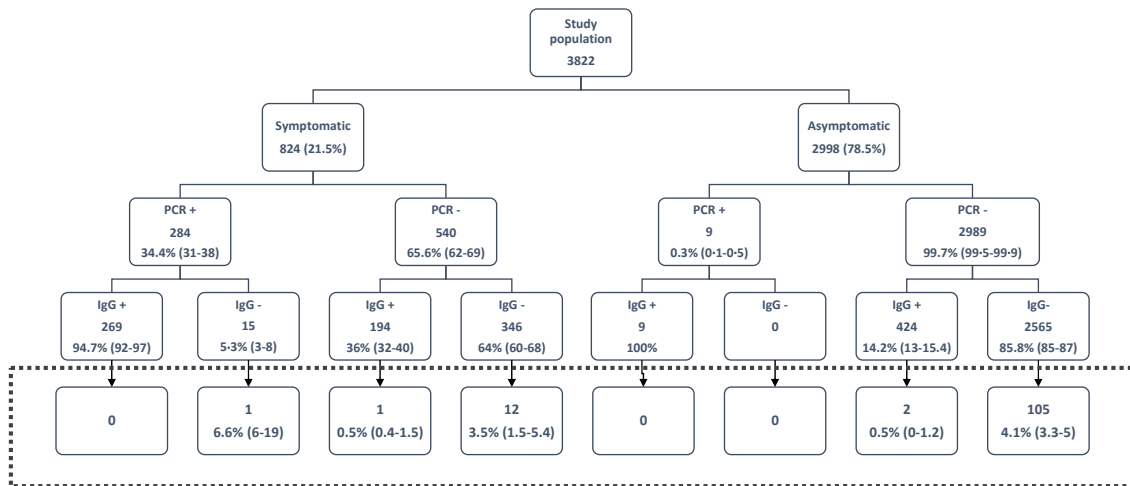

**Figure S2.** Flow diagram of the HCWs followed since individual vaccination until 15 November 2021, according to previous presence of symptoms, PCR result and specific serology (IgG+/IgG-), and rate of new infections/reinfections (black box). Between parentheses, 95% confidence interval for each rate.
